# Supplementary material
Source: publisher figshare collection journal article supplement (https://gsapubs.figshare.com/ndownloader/files/26629121)
Supplement: Supplementary file 1 [file 26629121]

## Sheet: G48508
Maloney, K.M., et al., 2021, New multicellular marine macroalgae from the early Tonian of northwestern Canada: Geology, v. 49, https://doi.org/10.1130/G48508.1

## Sheet: Fossils Samples
Sample Number	Colour	~# of specimens	Size	Bed	Notes
HCS-1	grey	many	medium	SP2	broken into several pieces
HCS-2	grey	many	small	SP2	surface is packed with specimens, very hard to see
HCS-3	grey	1 or 2	small	SP2	iron oxide atound specimen
HCS-4	grey	many	large	SP3	specimens appear clumped
HCS-5	grey	4	small	SP1	portions of specimens have thick orange border
HCS-6	grey	many	small	SP1
HCS-7	grey	1	small	SP1	long sample
HCS-8	grey	many	small	SP1	triangle shaped sample, broken piece on back
HCS-9	grey	many	large	SP1	v. fragile, two pieces seperated and a few smaller pieces
HCS-10	grey	many	v. small	SP1	Samples are fragile in bag
HCS-11	orange	many	small	OP1
HCS-12	red	1	small	RP1	2 pieces
HCS-13	red	3	small	RP1	2 pieces
HCS-14	red	3	small	RP1
HCS-15	red	6	small	RP1
HCS-16	red	many	medium	RP1	several pieces
HCS-17	orange	many	small	OP1
HCS-18	orange	many	medium	float	several pieces
HCS-19	orange	3	medium	float	big orange, small shale
HCS-20	grey	1	medium	float	looks like a snake
HCS-21	grey	5	medium	float
HCS-22	grey	10	medium	float
HCS-23	grey	15	small	HCS-562.5	light iron oxide almost looks white, branching?, in bag
HCS-24	rust	4	small	HCS-660	poor preservation, in bag
HCS-25	grey	5	v. small	HCS-670	split in 4 pieces, really good preservation
HCS-26	grey	1	v. small	HCS-670
HCS-27	orange	many	small	float	branching?, 4 samples in 1 bag
HCS-28	orange	many	small	float	4 samples in 1 bag
HCS-29	orange	many	small	float	4 samples in 1 bag
HCS-30	orange	many	small	float	4 samples in 1 bag
HCS-31	rust	many	medium	HCS-655	very poor preservation, may not be biological
HCS-32	rust	5	medium	float	very poor preservation, may not be biological
HCS-33	rust	25	meduim	float	very poor preservation, may not be biological
HCS-34	rust	8	small	float	very poor preservation, may not be biological
HCS-35	rust	4	small	float	very poor preservation, may not be biological
HCS-36	grey	1	small	float	P shaped
HCS-37	grey	10	small	float	poor preservation
HCS-38	grey	10	small	float	poor preservation
HCS-39	grey	3	medium	float	poor preservation
HCS-40	grey		small	float	poor preservation
HCS-41	orange	7	large	float	poor preservation
HCS-42	orange	8	small	float	poor preservation
HCS-43	orange	4	small	float	poor preservation
HCS-44	orange	15	small	float	poor preservation
HCS-45	orange	4	small	float	poor preservation
HCS-46	orange	10	small	float	poor preservation
HCS-47	orange	2	small	float	poor preservation
HCS-48	orange	25	small	float	poor preservation
HCS-49	orange	2	small	float	poor preservation, branching?, mineral growth?
HCS-50	orange	many	small	float	poor preservation, branching?, mineral growth?
HCS-51	orange	many	small	float	poor preservation, branching?, mineral growth?
HCS-52	orange	many	small	float	poor preservation, branching?, mineral growth?
HCS-53	orange	many	small	float	poor preservation, branching?, mineral growth?
HCS-54	orange	many	small	float	poor preservation, branching?, mineral growth?
HCS-55	red	5	small	float	excellent preservation, in bag
HCS-56	red	many	v. large	float	excellent preservation
HCS-57	red	6	small	float	excellent preservation
HCS-58	red	10	small	float	excellent preservation
HCS-59	red	10	small	float	excellent preservation
HCS-60	red	4	v.small	float	excellent preservation
HCS-61	red	6	medium	float
HCS-62	grey	5	small	float	2 pieces
HCS-63	grey	many	medium	float	fragile sample lots of pieces
HCS-64	grey	2	v. small	float	2 pieces
HCS-65	grey	1	v. small	float
HCS-66	grey	1	medium	float	specimens are curved
HCS-67	grey	3	medium	float	specimens are curved
HCS-68	rust	1	small	float	poor preservation, boundaries coated with iron oxide
HCS-69	shale	8	medium	float
HCS-70	shale	15	medium	float
HCS-71	shale	many	large	SP2	sample is very long, 2 parts
HCS-72	different	many	large	Valley-R	best sample
HCS-73	shale	1	small	Valley-R
HCS-74	orange	8	medium	Valley-R
HCS-75	shale	5	small	Valley-R
HCS-76	shale	many	small	Valley-R
HCS-77	shale	many	medium	Valley-L	multilpe pieces
HCS-78	shale	8	medium	Valley-L	top and bottom
HCS-79	orange	6	small	Valley-L	poor preservation
HCS-80	orange	many	small	float
HCS-81	orange	3	small	float
HCS-82	orange	4	small	float
HCS-83	shale	3	large	float
HCS-84	grey	5	medium	float
HCS-85	grey	15	medium	float
HCS-86	grey	many	medium	float
HCS-87	grey	7	medium	float
HCS-88	grey	1	medium	float
HCS-89	grey	10	v. small	float
HCS-90	grey	10	v. small	float

## Sheet: Specimen Measurements
Sample	Number of Specimen	Specimen	Length Size (mm)	Width (mm)	Number of segments	Shape	Location on sample	Grade	Bed
1	1	HCS-1.01	21	0.75	N/A	curved	front	1	515.6 m
1	2	HCS-1.02	11	0.75	N/A	straight	front	1	515.6 m
1	3	HCS-1.03	21	0.75	N/A	crossed	front	1	515.6 m
1	4	HCS-1.04	15	0.75	N/A	curved	front	1	515.6 m
1	5	HCS-1.05	21	0.75	N/A	straight	front	1	515.6 m
1	6	HCS-1.06	8	0.75	N/A	crossed	front	1	515.6 m
1	7	HCS-1.07	6	0.7	N/A	straight	P1	1	515.6 m
1	8	HCS-1.08	6	0.7	N/A	straight	P1	1	515.6 m
1	9	HCS-1.09	3	0.7	N/A	crossed	P1	1	515.6 m
1	10	HCS-1.10	3	0.7	N/A	crossed	P1	1	515.6 m
1	11	HCS-1.11	4	0.7	N/A	curved	P1	1	515.6 m
1	12	HCS-1.12	4	0.7	N/A	straight	P1	1	515.6 m
1	13	HCS-1.13	5	0.7	N/A	straight	P1	1	515.6 m
1	14	HCS-1.14	5	0.7	N/A	straight	P1	1	515.6 m
1	15	HCS-1.15	4	0.7	N/A	straight	P1	1	515.6 m
1	16	HCS-1.16	9	0.7	N/A	curved	P1	1	515.6 m
1	17	HCS-1.17	9	0.7	N/A	straight	P1	1	515.6 m
1	18	HCS-1.18	6	0.65	N/A	straight	P2	1	515.6 m
1	19	HCS-1.19	13	0.65	N/A	straight	P2	1	515.6 m
1	20	HCS-1.20	5	0.65	N/A	straight	P2	1	515.6 m
1	21	HCS-1.21	10	0.75	N/A	straight	P2	1	515.6 m
1	22	HCS-1.22	5	0.75	N/A	straight	P2	1	515.6 m
1	23	HCS-1.23	14	0.75	N/A	straight	P2	1	515.6 m
1	24	HCS-1.24	6	0.75	N/A	straight	P2	1	515.6 m
1	25	HCS-1.25	10	0.75	N/A	curved	P2	1	515.6 m
1	26	HCS-1.26	4	0.7	N/A	curved	P2	1	515.6 m
1	27	HCS-1.27	4	0.7	N/A	straight	P2	1	515.6 m
1	28	HCS-1.28	5	0.7	N/A	straight	P3	1	515.6 m
1	29	HCS-1.29	9	0.7	N/A	straight	P3	1	515.6 m
1	30	HCS-1.30	8	0.7	N/A	straight	P3	1	515.6 m
1	31	HCS-1.31	9	0.7	N/A	straight	P3	1	515.6 m
1	32	HCS-1.32	15	0.7	N/A	straight	P3	1	515.6 m
1	33	HCS-1.33	6	0.7	N/A	straight	P3	1	515.6 m
1	34	HCS-1.34	11	0.7	N/A	straight	P3	1	515.6 m
1	35	HCS-1.35	9	0.7	N/A	curved	P3	1	515.6 m
1	36	HCS-1.36	10	0.7	N/A		P3	1	515.6 m
2	1	HCS-2.01	20	0.7	30	straight	back	2	515.6 m
2	2	HCS-2.02	4	0.7	8	straight	back	2	515.6 m
2	3	HCS-2.03	9	0.7	16	curved	back	2	515.6 m
2	4	HCS-2.04	1	0.7	5	curved	back	2	515.6 m
2	5	HCS-2.05	6	0.7	11	curved	back	2	515.6 m
2	6	HCS-2.06	5	0.7	7	straight	back	2	515.6 m
2	7	HCS-2.07	4	0.7	4	straight	back	2	515.6 m
2	8	HCS-2.08	4	0.7	N/A	straight	front	2	515.6 m
2	9	HCS-2.09	3	0.7	3	straight	front	2	515.6 m
2	10	HCS-2.10	5	0.7	N/A	straight	front	2	515.6 m
2	11	HCS-2.11	8	0.7	N/A	straight	front	2	515.6 m
2	12	HCS-2.12	6	0.7	N/A	straight	front	2	515.6 m
2	13	HCS-2.13	5	0.7	N/A	slightly curved	front	2	515.6 m
2	14	HCS-2.14	5	0.7	N/A	slightly curved	front	2	515.6 m
2	15	HCS-2.15	4	0.7	N/A	straight	front	2	515.6 m
2	16	HCS-2.16	9	0.7	N/A	straight	front	2	515.6 m
2	17	HCS-2.17	7	0.7	N/A	straight	front	2	515.6 m
2	18	HCS-2.18	9	0.7	N/A	straight	front	2	515.6 m
2	19	HCS-2.19	8	0.7	N/A	straight	front	2	515.6 m
2	20	HCS-2.20	5	0.7	N/A	straight	front	2	515.6 m
2	21	HCS-2.21	3	0.7	N/A	straight	front	2	515.6 m
2	22	HCS-2.22	10	0.7	N/A	straight	front	2	515.6 m
2	23	HCS-2.23	5	0.7	N/A	straight	front	2	515.6 m
2	24	HCS-2.24	10	0.7	N/A	slightly curved	front	2	515.6 m
3	1	HCS-3.01	8	0.75	N/A	straight	front	1	515.6 m
3	2	HCS-3.02	9	0.75	N/A	straight	front	1	515.6 m
3	3	HCS-3.03	3	0.75	N/A	straight	front	1	515.6 m
3	4	HCS-3.04	27	0.75	26	straight	front	1	515.6 m
4	1	HCS-4.01	9	0.8	N/A	straight	front	1	520.8 m
4	2	HCS-4.02	24	0.8	N/A	straight	front	1	520.8 m
4	3	HCS-4.03	13	0.8	N/A	slightly curved	front	1	520.8 m
4	4	HCS-4.04	10	0.8	N/A	curved	front	1	520.8 m
4	5	HCS-4.05	8	0.8	N/A	curved	front	1	520.8 m
4	6	HCS-4.06	14	0.8	N/A	straight	front	1	520.8 m
4	7	HCS-4.07	7	0.8	N/A	straight	front	1	520.8 m
4	8	HCS-4.08	6	0.8	N/A	straight	front	1	520.8 m
4	9	HCS-4.09	8	0.8	N/A	hooked	front	1	520.8 m
4	10	HCS-4.10	9	0.8	N/A	slightly curved	front	1	520.8 m
4	11	HCS-4.11	25	0.8	N/A	hooked	front	1	520.8 m
4	12	HCS-4.12	4	0.8	N/A	straight	front	1	520.8 m
4	13	HCS-4.13	3	0.8	N/A	straight	front	1	520.8 m
4	14	HCS-4.14	2	0.8	N/A	straight	front	1	520.8 m
4	15	HCS-4.15	11	0.8	N/A	straight	front	1	520.8 m
4	16	HCS-4.16	3	0.8	N/A	straight	front	1	520.8 m
4	17	HCS-4.17	5	0.8	N/A	straight	front	1	520.8 m
4	18	HCS-4.18	3	0.8	N/A	straight	front	1	520.8 m
4	19	HCS-4.19	15	0.8	N/A	straight	front	1	520.8 m
4	20	HCS-4.20	17	0.8	N/A	hooked	front	1	520.8 m
4	21	HCS-4.21	14	0.8	N/A	cruved	front	1	520.8 m
4	22	HCS-4.22	5	0.8	N/A	straight	front	1	520.8 m
4	23	HCS-4.23	6	0.8	N/A	straight	front	1	520.8 m
4	24	HCS-4.24	20	0.8	N/A	slightly curved	front	1	520.8 m
4	25	HCS-4.25	7	0.8	N/A	curved	front	1	520.8 m
4	26	HCS-4.26	19	0.8	N/A	straight	front	1	520.8 m
4	27	HCS-4.27	4	0.8	N/A	straight	front	1	520.8 m
4	28	HCS-4.28	5	0.8	N/A	straight	front	1	520.8 m
4	29	HCS-4.29	28	0.8	N/A	straight	front	1	520.8 m
4	30	HCS-4.30	24	0.8	N/A	straight	front	1	520.8 m
4	31	HCS-4.31	5	0.8	N/A	straight	front	1	520.8 m
4	32	HCS-4.32	9	0.8	N/A	straight	front	1	520.8 m
4	33	HCS-4.33	10	0.8	N/A	straight	front	1	520.8 m
5	1	HCS-5.01	13	0.7	N/A	straight	front	1	511.5 m
5	2	HCS-5.02	17	0.7	N/A	curved	front	1	511.5 m
5	3	HCS-5.03	18	0.7	N/A	straight	front	1	511.5 m
5	4	HCS-5.04	11	0.7	N/A	straight	front	1	511.5 m
5	5	HCS-5.05	19	0.7	N/A	slightly curved	front	1	511.5 m
5	6	HCS-5.06	4	0.7	N/A	straight	front	1	511.5 m
5	7	HCS-5.07	9	0.7	N/A	curved	front	1	511.5 m
5	8	HCS-5.08	8	0.7	N/A	curved	front	1	511.5 m
5	9	HCS-5.09	4	0.7	N/A	straight	front	1	511.5 m
5	10	HCS-5.10	11	0.7	N/A	curved	front	1	511.5 m
5	11	HCS-5.11	7	0.7	N/A	curved	front	1	511.5 m
6	1	HCS-6.01	9	0.7	8	curved	front	2	511.5 m
6	2	HCS-6.02	5	0.7	6	straight	front	2	511.5 m
6	3	HCS-6.03	8	0.7	N/A	straight	front	2	511.5 m
6	4	HCS-6.04	8	0.7	N/A	straight	front	2	511.5 m
6	5	HCS-6.05	3	0.7	N/A	straight	front	2	511.5 m
6	6	HCS-6.06	10	0.7	8	straight	front	2	511.5 m
6	7	HCS-6.07	8	0.7	8	straight	front	2	511.5 m
6	8	HCS-6.08	5	0.7	6	straight	front	2	511.5 m
6	9	HCS-6.09	10	0.8	12	straight	front	2	511.5 m
6	10	HCS-6.10	6	0.8	8	curved	front	2	511.5 m
6	11	HCS-6.11	6	0.7	10	straight	front	2	511.5 m
6	12	HCS-6.12	6	0.7	N/A	straight	front	2	511.5 m
6	13	HCS-6.13	6	0.7	N/A	straight	front	2	511.5 m
6	14	HCS-6.14	7	0.7	N/A	curved	front	2	511.5 m
6	15	HCS-6.15	12	0.7	N/A	curved	front	2	511.5 m
6	16	HCS-6.16	8	0.7	N/A	straight	front	2	511.5 m
7	1	HCS-7.01	11	0.7	18	curved	front	1	511.5 m
7	2	HCS-7.02	4	0.7	N/A	straight	front	1	511.5 m
7	3	HCS-7.03	6	0.7	10	straight	front	1	511.5 m
8	1	HCS-8.01	8	0.7	N/A	slightly curved	back	2	511.5 m
8	2	HCS-8.02	19	0.8	N/A	hooked	front	2	511.5 m
8	3	HCS-8.03	18	0.65	N/A	very curved	front	2	511.5 m
8	4	HCS-8.04	11	0.8	N/A	straight	front	2	511.5 m
8	5	HCS-8.05	27	0.75	N/A	very curved	front	2	511.5 m
8	6	HCS-8.06	17	0.7	N/A	straight	front	2	511.5 m
8	7	HCS-8.07	15	0.7	N/A	straight	front	2	511.5 m
8	8	HCS-8.08	18	0.75	N/A	straight	front	2	511.5 m
8	9	HCS-8.09	11	0.7	N/A	slightly curved	front	2	511.5 m
8	10	HCS-8.10	10	0.7	N/A	straight	front	2	511.5 m
8	11	HCS-8.11	6	0.7	N/A	straight	front	2	511.5 m
9	1	HCS-9.01	12	0.65	15	curved	P1	1	511.5 m
9	2	HCS-9.02	7	0.65	N/A	slightly curved	P1	1	511.5 m
9	3	HCS-9.03	5	0.65	N/A	straight	P1	1	511.5 m
9	4	HCS-9.04	4	0.65	8	straight	P1	1	511.5 m
9	5	HCS-9.05	3	0.65	6	curved	P1	1	511.5 m
9	6	HCS-9.06	4	0.65	7	straight	P1	1	511.5 m
9	7	HCS-9.07	11	0.65	N/A	straight	P1	1	511.5 m
9	8	HCS-9.08	11	0.65	13	curved	P1	1	511.5 m
9	9	HCS-9.09	3	0.65	4	straight	P1	1	511.5 m
9	10	HCS-9.10	6	0.65	8	straight	P1	1	511.5 m
9	11	HCS-9.11	29	0.65	31	hooked	P2	1	511.5 m
9	12	HCS-9.12	14	0.65	22	straight	P2	1	511.5 m
9	13	HCS-9.13	10	0.65	14	straight	P2	1	511.5 m
9	14	HCS-9.14	7	0.65	9	straight	P2	1	511.5 m
9	15	HCS-9.15	7	0.65	9	straight	P2	1	511.5 m
9	16	HCS-9.16	8	0.65	13	straight	P2	1	511.5 m
9	17	HCS-9.17	16	0.65	20	straight	front	1	511.5 m
9	18	HCS-9.18	6	0.65	12	slightly curved	front	1	511.5 m
9	19	HCS-9.19	4	0.65	8	curved	front	1	511.5 m
9	20	HCS-9.20	13	0.65	15	slightly curved	front	1	511.5 m
9	21	HCS-9.21	15	0.65	19	slightly curved	front	1	511.5 m
9	22	HCS-9.22	8	0.65	9	curved	front	1	511.5 m
9	23	HCS-9.23	9	0.65	8	straight	front	1	511.5 m
9	24	HCS-9.24	6	0.65	8	straight	front	1	511.5 m
9	25	HCS-9.25	8	0.65	5	straight	front	1	511.5 m
9	26	HCS-9.26	8	0.65	7	hooked	front	1	511.5 m
9	27	HCS-9.27	3	0.65	3	straight	P1	1	511.5 m
9	28	HCS-9.28	11	0.65	11	curved	P1	1	511.5 m
9	29	HCS-9.29	6	0.65	6	straight	P1	1	511.5 m
9	30	HCS-9.30	7	0.65	7	straight	P1	1	511.5 m
9	31	HCS-9.31	5	0.65	5	straight	P1	1	511.5 m
10	1	HCS-10.01	12	0.65	N/A	straight	P1	2	511.5 m
10	2	HCS-10.02	11	0.65	N/A	straight	P1	2	511.5 m
10	3	HCS-10.03	12	0.65	N/A	hooked	P2	2	511.5 m
10	4	HCS-10.04	2	0.65	N/A	straight	P2	2	511.5 m
10	5	HCS-10.05	13	0.65	N/A	straight	P2	2	511.5 m
10	6	HCS-10.06	6	0.65	N/A	straight	P2	2	511.5 m
10	7	HCS-10.07	15	0.65	N/A	straight	P2	2	511.5 m
10	8	HCS-10.08	3	0.65	N/A	straight	P3	2	511.5 m
10	9	HCS-10.09	6	0.65	N/A	straight	P3	2	511.5 m
10	10	HCS-10.10	7	0.65	N/A	straight	P3	2	511.5 m
10	11	HCS-10.11	5	0.65	N/A	straight	P3	2	511.5 m
10	12	HCS-10.12	8	0.65	N/A	slightly curved	P3	2	511.5 m
10	13	HCS-10.13	4	0.65	N/A	straight	P3	2	511.5 m
11	1	HCS-11.01	30	0.65	N/A	straight	front	1	510.0 m
11	2	HCS-11.02	11	0.65	N/A	straight	front	1	510.0 m
11	3	HCS-11.03	8	0.65	N/A	curved	front	1	510.0 m
11	4	HCS-11.04	7	0.65	N/A	straight	front	1	510.0 m
11	5	HCS-11.05	18	0.65	N/A	straight	front	1	510.0 m
11	6	HCS-11.06	10	0.65	N/A	straight	front	1	510.0 m
11	7	HCS-11.07	11	0.65	N/A	straight	front	1	510.0 m
11	8	HCS-11.08	10	0.65	N/A	straight	back	1	510.0 m
11	9	HCS-11.09	16	0.65	N/A	slightly curved	back	1	510.0 m
11	10	HCS-11.10	5	0.65	N/A	straight	back	1	510.0 m
11	11	HCS-11.11	10	0.65	N/A	curved	back	1	510.0 m
11	12	HCS-11.12	6	0.65	N/A	straight	back	1	510.0 m
12	1	HCS-12.01	9	0.7	N/A	straight	front	1	519.0 m
12	2	HCS-12.02	23	0.7	N/A	curved	front	1	519.0 m
12	3	HCS-12.03	10	0.7	N/A	slightly curved	front	1	519.0 m
12	4	HCS-12.04	12	0.7	N/A	straight	front	1	519.0 m
12	5	HCS-12.05	6	0.7	N/A	curved	front	1	519.0 m
12	6	HCS-12.06	4	0.7	N/A	straight	front	1	519.0 m
13	1	HCS-13.01	7	0.7	9	straight	front	1	519.0 m
13	2	HCS-13.02	5	0.7	10	curved	front	1	519.0 m
13	3	HCS-13.03	6	0.7	6	straight	front	1	519.0 m
13	4	HCS-13.04	9	0.7	13	hooked	front	1	519.0 m
13	5	HCS-13.05	7	0.7	13	hooked	front	1	519.0 m
13	6	HCS-13.06	14	0.7	23	curved	front	1	519.0 m
14	1	HCS-14.01	7	0.6	10	straight	front	2	519.0 m
14	2	HCS-14.02	3	0.6	6	straight	front	2	519.0 m
14	3	HCS-14.03	2	0.6	5	straight	front	2	519.0 m
15	1	HCS-15.01	5	0.7	N/A	straight	front	2	519.0 m
15	2	HCS-15.02	8	0.7	N/A	straight	front	2	519.0 m
15	3	HCS-15.03	5	0.7	N/A	straight	front	3	519.0 m
15	4	HCS-15.04	6	0.7	N/A	slightly curved	front	3	519.0 m
15	5	HCS-15.05	12	0.7	N/A	slightly curved	front	3	519.0 m
16	1	HCS-16.01	13	0.7	N/A	straight	front	1	519.0 m
16	2	HCS-16.02	11	0.7	N/A	straight	front	1	519.0 m
16	3	HCS-16.03	8	0.7	N/A	straight	front	1	519.0 m
16	4	HCS-16.04	26	0.7	N/A	straight	front	1	519.0 m
16	5	HCS-16.05	14	0.7	N/A	straight	front	1	519.0 m
16	6	HCS-16.06	12	0.7	N/A	straight	front	1	519.0 m
16	7	HCS-16.07	6	0.7	10	straight	front	1	519.0 m
16	8	HCS-16.08	10	0.7	20	straight	front	1	519.0 m
16	9	HCS-16.09	19	0.7	15	straight	front	1	519.0 m
16	10	HCS-16.10	12	0.7	16	curved	front	1	519.0 m
16	11	HCS-16.11	7	0.7	N/A	straight	front	1	519.0 m
16	12	HCS-16.12	6	0.7	N/A	straight	front	1	519.0 m
16	13	HCS-16.13	12	0.7	N/A	straight	front	1	519.0 m
16	14	HCS-16.14	7	0.7	N/A	straight	front	1	519.0 m
16	15	HCS-16.15	12	0.7	N/A	straight	front	1	519.0 m
16	16	HCS-16.16	7	0.7	16	curved	front	1	519.0 m
16	17	HCS-16.17	14	0.7	N/A	straight	front	1	519.0 m
16	18	HCS-16.18	14	0.7	N/A	straight	front	1	519.0 m
16	19	HCS-16.19	9	0.7	N/A	straight	front	1	519.0 m
16	20	HCS-16.20	10	0.7	N/A	straight	front	1	519.0 m
16	21	HCS-16.21	7	0.7	N/A	slightly curved	front	1	519.0 m
16	22	HCS-16.22	10	0.7	N/A	straight	front	1	519.0 m
16	23	HCS-16.23	7	0.7	N/A	straight	front	1	519.0 m
16	24	HCS-16.24	11	0.7	N/A	straight	front	1	519.0 m
16	25	HCS-16.25	5	0.7	N/A	straight	front	1	519.0 m
17	1	HCS-17.01	13	0.7	N/A	straight	front	1	510.0 m
17	2	HCS-17.02	8	0.7	N/A	straight	front	1	510.0 m
17	3	HCS-17.03	7	0.7	N/A	straight	front	1	510.0 m
17	4	HCS-17.04	13	0.7	N/A	straight	front	1	510.0 m
17	5	HCS-17.05	6	0.7	N/A	straight	front	1	510.0 m
17	6	HCS-17.06	10	0.7	N/A	straight	front	1	510.0 m
17	7	HCS-17.07	11	0.7	N/A	straight	front	1	510.0 m
17	8	HCS-17.08	13	0.7	N/A	straight	front	1	510.0 m
17	9	HCS-17.09	9	0.7	N/A	straight	front	1	510.0 m
17	10	HCS-17.10	9	0.7	N/A	curved	front	1	510.0 m
17	11	HCS-17.11	5	0.7	N/A	straight	front	1	510.0 m
Average			9.35955	0.67809
Standard deviation			4.77505	0.0281585
Standard error			0.506154	0.00298479
Maximum			30	0.7
Minimum			2	0.6

## Sheet: Cell Measurements
Sample	Specimen	Length of Organism (mm)	Segment	Height (mm)	Width (mm)	Notes
2	HCS-2.01	20	1	0.45	0.7	Cell width same as organism width, no buldging
2	HCS-2.01	20	2	0.47	0.7
2	HCS-2.01	20	3	0.46	0.7
2	HCS-2.01	20	4	0.5	0.7
2	HCS-2.01	20	5	0.49	0.7
2	HCS-2.01	20	6	0.48	0.7
2	HCS-2.01	20	7	0.53	0.7
2	HCS-2.01	20	8	0.51	0.7
2	HCS-2.01	20	9	0.49	0.7
2	HCS-2.01	20	10	0.49	0.7
2	HCS-2.01	20	11	0.48	0.7
2	HCS-2.01	20	12	0.51	0.7
2	HCS-2.01	20	13	0.49	0.7
2	HCS-2.01	20	14	0.49	0.7
2	HCS-2.01	20	15	0.46	0.7
2	HCS-2.01	20	16	0.45	0.7
2	HCS-2.01	20	17	0.5	0.7
2	HCS-2.01	20	18	0.48	0.7
2	HCS-2.01	20	19	0.45	0.7
2	HCS-2.01	20	20	0.49	0.7
2	HCS-2.01	20	21	0.51	0.7
2	HCS-2.01	20	22	0.45	0.7
2	HCS-2.01	20	23	0.51	0.7
2	HCS-2.01	20	24	0.51	0.7
2	HCS-2.01	20	25	0.49	0.7
2	HCS-2.01	20	26	0.49	0.7
2	HCS-2.01	20	27	0.46	0.7
2	HCS-2.01	20	28	0.45	0.7
2	HCS-2.01	20	29	0.49	0.7
2	HCS-2.01	20	30	0.48	0.7
2	HCS-2.02	4	1	0.5	0.7
2	HCS-2.02	4	2	0.49	0.7
2	HCS-2.02	4	3	0.51	0.7
2	HCS-2.02	4	4	0.5	0.7
2	HCS-2.02	4	5	0.5	0.7
2	HCS-2.02	4	6	0.51	0.7
2	HCS-2.02	4	7	0.5	0.7
2	HCS-2.02	4	8	0.49	0.7
2	HCS-2.03	9	1	0.5	0.7
2	HCS-2.03	9	2	0.51	0.7
2	HCS-2.03	9	3	0.48	0.7
2	HCS-2.03	9	4	0.49	0.7
2	HCS-2.03	9	5	0.51	0.7
2	HCS-2.03	9	6	0.5	0.7
2	HCS-2.03	9	7	0.5	0.7
2	HCS-2.03	9	8	0.51	0.7
2	HCS-2.03	9	9	0.49	0.7
2	HCS-2.03	9	10	0.51	0.7
2	HCS-2.03	9	11	0.48	0.7
2	HCS-2.03	9	12	0.5	0.7
2	HCS-2.03	9	13	0.5	0.7
2	HCS-2.03	9	14	0.5	0.7
2	HCS-2.03	9	15	0.48	0.7
2	HCS-2.03	9	16	0.49	0.7
2	HCS-2.05	6	1	0.49	0.7
2	HCS-2.05	6	2	0.47	0.7
2	HCS-2.05	6	3	0.5	0.7
2	HCS-2.05	6	4	0.49	0.7
2	HCS-2.05	6	5	0.49	0.7
2	HCS-2.05	6	6	0.48	0.7
2	HCS-2.05	6	7	0.5	0.7
2	HCS-2.05	6	8	0.5	0.7
2	HCS-2.05	6	9	0.51	0.7
3	HCS-3.04	27	1	0.51	0.7
3	HCS-3.04	27	2	0.49	0.7
3	HCS-3.04	27	3	0.5	0.7
3	HCS-3.04	27	4	0.51	0.7
3	HCS-3.04	27	5	0.49	0.7
3	HCS-3.04	27	6	0.48	0.7
3	HCS-3.04	27	7	0.5	0.7
3	HCS-3.04	27	8	0.5	0.7
3	HCS-3.04	27	9	0.52	0.7
3	HCS-3.04	27	10	0.49	0.7
3	HCS-3.04	27	11	0.5	0.7
3	HCS-3.04	27	12	0.49	0.7
3	HCS-3.04	27	13	0.51	0.7
3	HCS-3.04	27	14	0.5	0.7
3	HCS-3.04	27	15	0.51	0.7
3	HCS-3.04	27	16	0.51	0.7
3	HCS-3.04	27	17	0.5	0.7
3	HCS-3.04	27	18	0.51	0.7
3	HCS-3.04	27	19	0.51	0.7
3	HCS-3.04	27	20	0.5	0.7
3	HCS-3.04	27	21	0.49	0.7
3	HCS-3.04	27	22	0.48	0.7
3	HCS-3.04	27	23	0.51	0.7
3	HCS-3.04	27	24	0.49	0.7
3	HCS-3.04	27	25	0.51	0.7
3	HCS-3.04	27	26	0.49	0.7
6	HCS-6.01	9	1	0.47	0.7
6	HCS-6.01	9	2	0.5	0.7
6	HCS-6.01	9	3	0.49	0.7
6	HCS-6.01	9	4	0.48	0.7
6	HCS-6.01	9	5	0.51	0.7
6	HCS-6.01	9	6	0.5	0.7
6	HCS-6.01	9	7	0.5	0.7
6	HCS-6.01	9	8	0.49	0.7
6	HCS-6.02	5	1	0.5	0.7
6	HCS-6.02	5	2	0.51	0.7
6	HCS-6.02	5	3	0.49	0.7
6	HCS-6.02	5	4	0.48	0.7
6	HCS-6.02	5	5	0.5	0.7
6	HCS-6.02	5	6	0.51	0.7
6	HCS-6.06	10	1	0.49	0.7
6	HCS-6.06	10	2	0.49	0.7
6	HCS-6.06	10	3	0.48	0.7
6	HCS-6.06	10	4	0.52	0.7
6	HCS-6.06	10	5	0.49	0.7
6	HCS-6.06	10	6	0.49	0.7
6	HCS-6.06	10	7	0.48	0.7
6	HCS-6.06	10	8	0.5	0.7
6	HCS-6.07	8	1	0.49	0.7
6	HCS-6.07	8	2	0.48	0.7
6	HCS-6.07	8	3	0.49	0.7
6	HCS-6.07	8	4	0.51	0.7
6	HCS-6.07	8	5	0.49	0.7
6	HCS-6.07	8	6	0.48	0.7
6	HCS-6.07	8	7	0.48	0.7
6	HCS-6.07	8	8	0.51	0.7
6	HCS-6.08	5	1	0.49	0.7
6	HCS-6.08	5	2	0.48	0.7
6	HCS-6.08	5	3	0.5	0.7
6	HCS-6.08	5	4	0.5	0.7
6	HCS-6.08	5	5	0.5	0.7
6	HCS-6.08	5	6	0.48	0.7
6	HCS-6.09	10	1	0.51	0.8
6	HCS-6.09	10	2	0.49	0.8
6	HCS-6.09	10	3	0.49	0.8
6	HCS-6.09	10	4	0.49	0.8
6	HCS-6.09	10	5	0.52	0.8
6	HCS-6.09	10	6	0.52	0.8
6	HCS-6.09	10	7	0.49	0.8
6	HCS-6.09	10	8	0.49	0.8
6	HCS-6.09	10	9	0.49	0.8
6	HCS-6.09	10	10	0.52	0.8
6	HCS-6.09	10	11	0.49	0.8
6	HCS-6.09	10	12	0.49	0.8
6	HCS-6.10	6	1	0.51	0.8
6	HCS-6.10	6	2	0.48	0.8
6	HCS-6.10	6	3	0.5	0.8
6	HCS-6.10	6	4	0.5	0.8
6	HCS-6.10	6	5	0.5	0.8
6	HCS-6.10	6	6	0.49	0.8
6	HCS-6.10	6	7	0.5	0.8
6	HCS-6.10	6	8	0.48	0.8
6	HCS-6.11	6	1	0.49	0.7
6	HCS-6.11	6	2	0.5	0.7
6	HCS-6.11	6	3	0.52	0.7
6	HCS-6.11	6	4	0.5	0.7
6	HCS-6.11	6	5	0.51	0.7
6	HCS-6.11	6	6	0.5	0.7
6	HCS-6.11	6	7	0.51	0.7
6	HCS-6.11	6	8	0.49	0.7
6	HCS-6.11	6	9	0.5	0.7
6	HCS-6.11	6	10	0.51	0.7
Average				0.494323	0.712903
Standard deviation				0.01676	1.22816e-15
Standard error				0.00177656	1.30185e-16
Maximum				0.53	0.7
Minimum				0.45	0.7

## Sheet: Small Specimens
Sample	Specimen	Length (mm)	Width (mm)	Shape	Location	Photo ID	Notes
HCS-59	1	0.48	0.04	straight	back	03:37:00	diagonal ~45,
HCS-59	2	0.8	0.05	straight	back	03:37:00
HCS-59	3	0.45	0.04	straight	back	03:37:00
HCS-59	4	1.27	0.04	curved	back	03:41:00	v shaped, overlies larger fossil
HCS-59	5	1.67	0.03	curved	back	03:43:00	v shaped
HCS-59	6	0.37	0.03	slightly curved	back	03:43:00
HCS-59	7	0.23	0.03	straight	back	03:45:00
HCS-59	8	0.24	0.03	straight	back	03:45:00
HCS-59	9	0.37	0.03	straight	back	03:49:00
HCS-59	10	0.44	0.04	straight	back	03:49:00
HCS-59	11	0.37	0.04	straight	back	03:49:00
HCS-59	12	0.63	0.03	straight	back	03:56:00
HCS-59	13	1.21	0.04	straight	back	03:57:00	middle is buried
HCS-59	14	1.24	0.03	slightly curved	back	03:59:00	slight v shape in the middle of a relatively straight sample
HCS-59	15	0.31	0.03	slightly curved	back	04:14:00
HCS-59	16	0.79	0.03	hooked	back	04:16:00	possible branching or two organisms
HCS-59	17	0.57	0.04	straight	front	04:24:00	overlies larger fossil
HCS-59	18	0.31	0.03	straight	front	04:24:00
HCS-59	19	1.01	0.04	slightly curved	front	04:25:00
HCS-59	20	0.94	0.03	slightly curved	front	04:25:00
HCS-59	21	0.64	0.03	straight	front	04:27:00
HCS-59	22	0.58	0.05	straight	front	04:28:00
HCS-59	23	0.51	0.04	hooked	front	04:28:00
HCS-59	24	1.38	0.04	curved	front	04:30:00	odd shape, straight part connected to C
HCS-59	25	0.63	0.03	slightly curved	front	04:32:00	below larger fossil
HCS-59	26	0.43	0.04	slightly curved	front	04:35:00
HCS-59	27	0.41	0.04	straight	front	04:37:00
HCS-59	28	0.48	0.03	slightly curved	front	04:37:00
HCS-59	29	0.66	0.04	straight	front	04:37:00
HCS-59	30	1.27	0.04	straight	front	04:38:00
HCS-57	1	0.72	0.03	straight	front	04:43:00
HCS-57	2	0.7	0.03	straight	front	04:47:00
HCS-57	3	1.79	0.03	straight	front	04:51:00
HCS-56	1	0.41	0.03	straight	P2	04:54:00
HCS-56	2	0.79	0.03	straight	P2	04:58:00
HCS-56	3	0.4	0.03	straight	P2	04:58:00
HCS-56	4	0.52	0.03	straight	P2	05:01:00
HCS-56	5	0.92	0.03	slightly curved	P2	05:05:00
HCS-56	6	0.59	0.04	curved	P2	05:07:00
HCS-56	7	1.55	0.04	straight	P2	05:09:00
HCS-56	1	0.88	0.03	slightly curved	P2	05:11:00
HCS-56	2	1.41	0.04	curved	P1	05:29:00	overlaps another fossil
HCS-56	3	0.64	0.04	straight	P1	05:29:00	overlaped by another fossil
HCS-56	4	0.39	0.03	straight	P1	05:30:00	crossed
HCS-56	5	0.78	0.04	straight	P1	05:30:00	crossed
HCS-56	6	1.09	0.04	bent	P1	05:43:00	possibly 1 organism (6-8)
HCS-56	7	1.87	0.04	bent	P1	05:43:00	possibly 1 organism (6-8)
HCS-56	8	0.92	0.04	bent	P1	05:43:00	possibly 1 organism (6-8)
HCS-56	9	1.22	0.04	straight		05:36:00
HCS-56	10	0.85	0.04	slightly curved		05:36:00
HCS-56	11	1.31	0.04	straight		05:36:00
HCS-56	12	0.54	0.04	straight		05:38:00
HCS-56	13	1.13	0.04	slightly curved		05:38:00
HCS-56	14	0.95	0.03	slightly curved		05:38:00
HCS-56	15	0.79	0.03	straight		05:38:00
HCS-56	16	0.6	0.03	slightly curved		05:38:00
HCS-56	17	0.52	0.03	straight		07:08:00
HCS-56	18	1.2	0.04	curved		07:10:00
HCS-56	19	0.7	0.03	straight		07:12:00
HCS-56	20	0.76	0.03	straight		07:13:00
HCS-56	21	0.67	0.04	straight		07:17:00	looks like width varies, but it appears to be partially buried
HCS-56	22	0.32	0.03	straight		07:17:00
HCS-56	23	4.9	0.04	straight		07:20:00
HCS-56	24	1.08	0.04	straight		07:25:00
HCS-56	25	0.71	0.04	straight		07:25:00
HCS-56	26	1.11	0.05	straight		07:26:00
HCS-56	27	0.53	0.04	straight		07:27:00
HCS-56	28	1.17	0.03	hooked		07:30:00
HCS-56	29	0.67	0.04	slightly curved		07:31:00
HCS-56	30	1.04	0.04	straight		07:31:00
HCS-56	31	1.15	0.04	hooked		07:31:00	possibly branched
HCS-56	32	0.77	0.04	straight		07:35:00
HCS-56	33	1.57	0.03	slightly curved		07:36:00
HCS-56	34	1.87	0.04	bent		07:45:00	appears twisted and bent over
HCS-56	35	2.45	0.04	curved		07:48:00
HCS-56	36	0.73	0.04	straight		07:49:00
HCS-56	37	0.99	0.03	straight		07:52:00
HCS-56	38	0.38	0.04	straight		07:53:00
HCS-56	39	0.4	0.03	hooked		07:53:00
HCS-56	40	2.24	0.03	hooked		07:53:00
HCS-56	41	0.5	0.04	straight		07:53:00
HCS-56	42	1.48	0.03	straight		07:53:00	intertwinned, could be additional orgnaisms or branching??
HCS-56	43	1.12	0.04	hooked		07:53:00	intertwinned, could be additional orgnaisms or branching?? Thallus width varies likely branching?
HCS-56	44	0.86	0.04	slightly curved		07:53:00	intertwinned, could be additional orgnaisms or branching??
HCS-56	45	1.96	0.03	slightly curved		07:54:00
HCS-56	46	0.96	0.03	slightly curved		07:54:00
HCS-56	47	0.76	0.04	straight		07:57:00
HCS-56	48	0.98	0.04	straight		07:57:00
HCS-56	49	3.86	0.04	slightly curved		08:00:00
							branched
Average		0.953483	0.0359551
Standard deviation		0.701541	0.00558389
Standard error		0.0743632	0.000591891
Maximum		4.9	0.05
Minimum		0.23	0.03

## Sheet: Size Comparison
Sample	Specimen	Length (mm)	Width (mm)
HCS-59	1	0.48	0.04		30	39
HCS-59	2	0.8	0.05		40	47
HCS-59	3	0.45	0.04		50	3
HCS-59	4	1.27	0.04		600	3
HCS-59	5	1.67	0.03		650	60
HCS-59	6	0.37	0.03		700	133
HCS-59	7	0.23	0.03		750	17
HCS-59	8	0.24	0.03		800	37
HCS-59	9	0.37	0.03		Sum	339
HCS-59	10	0.44	0.04
HCS-59	11	0.37	0.04
HCS-59	12	0.63	0.03
HCS-59	13	1.21	0.04
HCS-59	14	1.24	0.03
HCS-59	15	0.31	0.03
HCS-59	16	0.79	0.03
HCS-59	17	0.57	0.04
HCS-59	18	0.31	0.03
HCS-59	19	1.01	0.04
HCS-59	20	0.94	0.03
HCS-59	21	0.64	0.03
HCS-59	22	0.58	0.05
HCS-59	23	0.51	0.04
HCS-59	24	1.38	0.04
HCS-59	25	0.63	0.03
HCS-59	26	0.43	0.04
HCS-59	27	0.41	0.04
HCS-59	28	0.48	0.03
HCS-59	29	0.66	0.04
HCS-59	30	1.27	0.04
HCS-57	1	0.72	0.03
HCS-57	2	0.7	0.03
HCS-57	3	1.79	0.03
HCS-56	1	0.41	0.03
HCS-56	2	0.79	0.03
HCS-56	3	0.4	0.03
HCS-56	4	0.52	0.03
HCS-56	5	0.92	0.03
HCS-56	6	0.59	0.04
HCS-56	7	1.55	0.04
HCS-56	1	0.88	0.03
HCS-56	2	1.41	0.04
HCS-56	3	0.64	0.04
HCS-56	4	0.39	0.03
HCS-56	5	0.78	0.04
HCS-56	6	1.09	0.04
HCS-56	7	1.87	0.04
HCS-56	8	0.92	0.04
HCS-56	9	1.22	0.04
HCS-56	10	0.85	0.04
HCS-56	11	1.31	0.04
HCS-56	12	0.54	0.04
HCS-56	13	1.13	0.04
HCS-56	14	0.95	0.03
HCS-56	15	0.79	0.03
HCS-56	16	0.6	0.03
HCS-56	17	0.52	0.03
HCS-56	18	1.2	0.04
HCS-56	19	0.7	0.03
HCS-56	20	0.76	0.03
HCS-56	21	0.67	0.04
HCS-56	22	0.32	0.03
HCS-56	23	4.9	0.04
HCS-56	24	1.08	0.04
HCS-56	25	0.71	0.04
HCS-56	26	1.11	0.05
HCS-56	27	0.53	0.04
HCS-56	28	1.17	0.03
HCS-56	29	0.67	0.04
HCS-56	30	1.04	0.04
HCS-56	31	1.15	0.04
HCS-56	32	0.77	0.04
HCS-56	33	1.57	0.03
HCS-56	34	1.87	0.04
HCS-56	35	2.45	0.04
HCS-56	36	0.73	0.04
HCS-56	37	0.99	0.03
HCS-56	38	0.38	0.04
HCS-56	39	0.4	0.03
HCS-56	40	2.24	0.03
HCS-56	41	0.5	0.04
HCS-56	42	1.48	0.03
HCS-56	43	1.12	0.04
HCS-56	44	0.86	0.04
HCS-56	45	1.96	0.03
HCS-56	46	0.96	0.03
HCS-56	47	0.76	0.04
HCS-56	48	0.98	0.04
HCS-56	49	3.86	0.04
HCS-1.01		21	0.75
HCS-1.02		11	0.75
HCS-1.03		21	0.75
HCS-1.04		15	0.75
HCS-1.05		21	0.75
HCS-1.06		8	0.75
HCS-1.07		6	0.7
HCS-1.08		6	0.7
HCS-1.09		3	0.7
HCS-1.10		3	0.7
HCS-1.11		4	0.7
HCS-1.12		4	0.7
HCS-1.13		5	0.7
HCS-1.14		5	0.7
HCS-1.15		4	0.7
HCS-1.16		9	0.7
HCS-1.17		9	0.7
HCS-1.18		6	0.65
HCS-1.19		13	0.65
HCS-1.20		5	0.65
HCS-1.21		10	0.75
HCS-1.22		5	0.75
HCS-1.23		14	0.75
HCS-1.24		6	0.75
HCS-1.25		10	0.75
HCS-1.26		4	0.7
HCS-1.27		4	0.7
HCS-1.28		5	0.7
HCS-1.29		9	0.7
HCS-1.30		8	0.7
HCS-1.31		9	0.7
HCS-1.32		15	0.7
HCS-1.33		6	0.7
HCS-1.34		11	0.7
HCS-1.35		9	0.7
HCS-1.36		10	0.7
HCS-2.01		20	0.7
HCS-2.02		4	0.7
HCS-2.03		9	0.7
HCS-2.04		1	0.7
HCS-2.05		6	0.7
HCS-2.06		5	0.7
HCS-2.07		4	0.7
HCS-2.08		4	0.7
HCS-2.09		3	0.7
HCS-2.10		5	0.7
HCS-2.11		8	0.7
HCS-2.12		6	0.7
HCS-2.13		5	0.7
HCS-2.14		5	0.7
HCS-2.15		4	0.7
HCS-2.16		9	0.7
HCS-2.17		7	0.7
HCS-2.18		9	0.7
HCS-2.19		8	0.7
HCS-2.20		5	0.7
HCS-2.21		3	0.7
HCS-2.22		10	0.7
HCS-2.23		5	0.7
HCS-2.24		10	0.7
HCS-3.01		8	0.75
HCS-3.02		9	0.75
HCS-3.03		3	0.75
HCS-3.04		27	0.75
HCS-4.01		9	0.8
HCS-4.02		24	0.8
HCS-4.03		13	0.8
HCS-4.04		10	0.8
HCS-4.05		8	0.8
HCS-4.06		14	0.8
HCS-4.07		7	0.8
HCS-4.08		6	0.8
HCS-4.09		8	0.8
HCS-4.10		9	0.8
HCS-4.11		25	0.8
HCS-4.12		4	0.8
HCS-4.13		3	0.8
HCS-4.14		2	0.8
HCS-4.15		11	0.8
HCS-4.16		3	0.8
HCS-4.17		5	0.8
HCS-4.18		3	0.8
HCS-4.19		15	0.8
HCS-4.20		17	0.8
HCS-4.21		14	0.8
HCS-4.22		5	0.8
HCS-4.23		6	0.8
HCS-4.24		20	0.8
HCS-4.25		7	0.8
HCS-4.26		19	0.8
HCS-4.27		4	0.8
HCS-4.28		5	0.8
HCS-4.29		28	0.8
HCS-4.30		24	0.8
HCS-4.31		5	0.8
HCS-4.32		9	0.8
HCS-4.33		10	0.8
HCS-5.01		13	0.7
HCS-5.02		17	0.7
HCS-5.03		18	0.7
HCS-5.04		11	0.7
HCS-5.05		19	0.7
HCS-5.06		4	0.7
HCS-5.07		9	0.7
HCS-5.08		8	0.7
HCS-5.09		4	0.7
HCS-5.10		11	0.7
HCS-5.11		7	0.7
HCS-6.01		9	0.7
HCS-6.02		5	0.7
HCS-6.03		8	0.7
HCS-6.04		8	0.7
HCS-6.05		3	0.7
HCS-6.06		10	0.7
HCS-6.07		8	0.7
HCS-6.08		5	0.7
HCS-6.09		10	0.8
HCS-6.10		6	0.8
HCS-6.11		6	0.7
HCS-6.12		6	0.7
HCS-6.13		6	0.7
HCS-6.14		7	0.7
HCS-6.15		12	0.7
HCS-6.16		8	0.7
HCS-7.01		11	0.7
HCS-7.02		4	0.7
HCS-7.03		6	0.7
HCS-8.01		8	0.7
HCS-8.02		19	0.8
HCS-8.03		18	0.65
HCS-8.04		11	0.8
HCS-8.05		27	0.75
HCS-8.06		17	0.7
HCS-8.07		15	0.7
HCS-8.08		18	0.75
HCS-8.09		11	0.7
HCS-8.10		10	0.7
HCS-8.11		6	0.7
HCS-9.01		12	0.65
HCS-9.02		7	0.65
HCS-9.03		5	0.65
HCS-9.04		4	0.65
HCS-9.05		3	0.65
HCS-9.06		4	0.65
HCS-9.07		11	0.65
HCS-9.08		11	0.65
HCS-9.09		3	0.65
HCS-9.10		6	0.65
HCS-9.11		29	0.65
HCS-9.12		14	0.65
HCS-9.13		10	0.65
HCS-9.14		7	0.65
HCS-9.15		7	0.65
HCS-9.16		8	0.65
HCS-9.17		16	0.65
HCS-9.18		6	0.65
HCS-9.19		4	0.65
HCS-9.20		13	0.65
HCS-9.21		15	0.65
HCS-9.22		8	0.65
HCS-9.23		9	0.65
HCS-9.24		6	0.65
HCS-9.25		8	0.65
HCS-9.26		8	0.65
HCS-9.27		3	0.65
HCS-9.28		11	0.65
HCS-9.29		6	0.65
HCS-9.30		7	0.65
HCS-9.31		5	0.65
HCS-10.01		12	0.65
HCS-10.02		11	0.65
HCS-10.03		12	0.65
HCS-10.04		2	0.65
HCS-10.05		13	0.65
HCS-10.06		6	0.65
HCS-10.07		15	0.65
HCS-10.08		3	0.65
HCS-10.09		6	0.65
HCS-10.10		7	0.65
HCS-10.11		5	0.65
HCS-10.12		8	0.65
HCS-10.13		4	0.65
HCS-11.01		30	0.65
HCS-11.02		11	0.65
HCS-11.03		8	0.65
HCS-11.04		7	0.65
HCS-11.05		18	0.65
HCS-11.06		10	0.65
HCS-11.07		11	0.65
HCS-11.08		10	0.65
HCS-11.09		16	0.65
HCS-11.10		5	0.65
HCS-11.11		10	0.65
HCS-11.12		6	0.65
HCS-12.01		9	0.7
HCS-12.02		23	0.7
HCS-12.03		10	0.7
HCS-12.04		12	0.7
HCS-12.05		6	0.7
HCS-12.06		4	0.7
HCS-13.01		7	0.7
HCS-13.02		5	0.7
HCS-13.03		6	0.7
HCS-13.04		9	0.7
HCS-13.05		7	0.7
HCS-13.06		14	0.7
HCS-14.01		7	0.6
HCS-14.02		3	0.6
HCS-14.03		2	0.6
HCS-15.01		5	0.7
HCS-15.02		8	0.7
HCS-15.03		5	0.7
HCS-15.04		6	0.7
HCS-15.05		12	0.7
HCS-16.01		13	0.7
HCS-16.02		11	0.7
HCS-16.03		8	0.7
HCS-16.04		26	0.7
HCS-16.05		14	0.7
HCS-16.06		12	0.7
HCS-16.07		6	0.7
HCS-16.08		10	0.7
HCS-16.09		19	0.7
HCS-16.10		12	0.7
HCS-16.11		7	0.7
HCS-16.12		6	0.7
HCS-16.13		12	0.7
HCS-16.14		7	0.7
HCS-16.15		12	0.7
HCS-16.16		7	0.7
HCS-16.17		14	0.7
HCS-16.18		14	0.7
HCS-16.19		9	0.7
HCS-16.20		10	0.7
HCS-16.21		7	0.7
HCS-16.22		10	0.7
HCS-16.23		7	0.7
HCS-16.24		11	0.7
HCS-16.25		5	0.7
HCS-17.01		13	0.7
HCS-17.02		8	0.7
HCS-17.03		7	0.7
HCS-17.04		13	0.7
HCS-17.05		6	0.7
HCS-17.06		10	0.7
HCS-17.07		11	0.7
HCS-17.08		13	0.7
HCS-17.09		9	0.7
HCS-17.10		9	0.7
HCS-17.11		5	0.7
			339
